# Supplementary material
Source: publisher figshare collection journal article supplement (https://frontiersin.figshare.com/ndownloader/files/25444253)
Supplement: Supplementary file 1 [file 25444253]

Supplementary Material 1. Collection numbers for the specimens employed in the study. AMNH: American Museum of Natural History, New York, U.S.A.; CNP-MAM and LAMAMA: Laboratorio de Mamíferos Marinos of the Centro Nacional Patagónico, CESIMAR-CENPAT, Puerto Madryn, Argentina; CZIP: Instituto de la Patagonia of the Universidad de Magallanes, Punta Arenas, Chile; RNP and MT: Museo Acatushún de Aves y Mamíferos Australes, Ushuaia, Argentina; MACN: Museo Argentino de Ciencias Naturales Bernardino Rivadavia, Buenos Aires, Argentina; USNM: US National Museum of Natural History, Smithsonian Institution, Washington D.C., U.S.A.

*Cephalorhynchus commersonii*: RNP 0634, RNP 0636, RNP 0637, RNP 0648, RNP 0651, RNP 0653, RNP 0675, RNP 0731, RNP 0957, RNP 1169, RNP 1339, RNP 1384, RNP 1466, RNP 1893, RNP 1910, RNP 1913, RNP 2119, RNP 2139, RNP 2150, RNP 2181, RNP 2200, RNP 2208, RNP 2209, RNP 2246, RNP 2484, RNP 2529, RNP 2670, RNP 2672, RNP 2685, RNP 2688, RNP 2701, RNP 2729, RNP 2730, USNM 550154, USNM 550155, USNM 550156, USNM 550449

*L. australis*: CZIP 0999, CZIP 057, MACN 20483, RNP 0179, RNP 0269, RNP 0649, RNP 0713a, RNP 0716, RNP 0717, RNP 0718, RNP 0719, RNP 0720, RNP 0753, RNP 0761, RNP 0836, RNP 1164, RNP 1475, RNP 1760, RNP 1855, RNP 2024, RNP 2128, RNP 2577, RNP 2805, USNM 395346

*L. obscurus*: RNP 1104, MT 2542, CNP-MAM 100574, CNP-MAM 100575, CNP-MAM 100576, CNP-MAM 100578, CNP-MAM 100579, CNP-MAM 100580, CNP-MAM 100581, CNP-MAM 100582, CNP-MAM 100583, CNP-MAM 100588, CNP-MAM 100589, CNP-MAM 100592, CNP-MAM 100597, CNP-MAM 100779, CNP-MAM 100780, LAMAMA LO 062, LAMAMA LO 063, LAMAMA LO 077, LAMAMA LO 078, LAMAMA LO 079, LAMAMA LO 082, LAMAMA LO 084, LAMAMA LO 088, MACN 20481, MACN 27.2, USNM 550144, USNM 395382

*L. cruciger*: CNPMAMM 640, CNPMAMM 641, CZIP 1007, CZIP 1080, RNP 1264, RNP 2217, RNP 2366, RNP 2704, RNP 2717, AMNH 35150
